# Supplementary material for: Phylogenetic Reassessment, Taxonomy, and Biogeography of Codinaea and Similar Fungi
Source: MDPI journal article supplement (doi:10.3390/jof7121097), 2021-12-20

Figure S1. Detailed maps of the geographical distribution of *Codinaea*, *Codinaeella* and *Stilbochaeta* species based on the GlobalFungi database.

### ***Codinaea amazonensis***

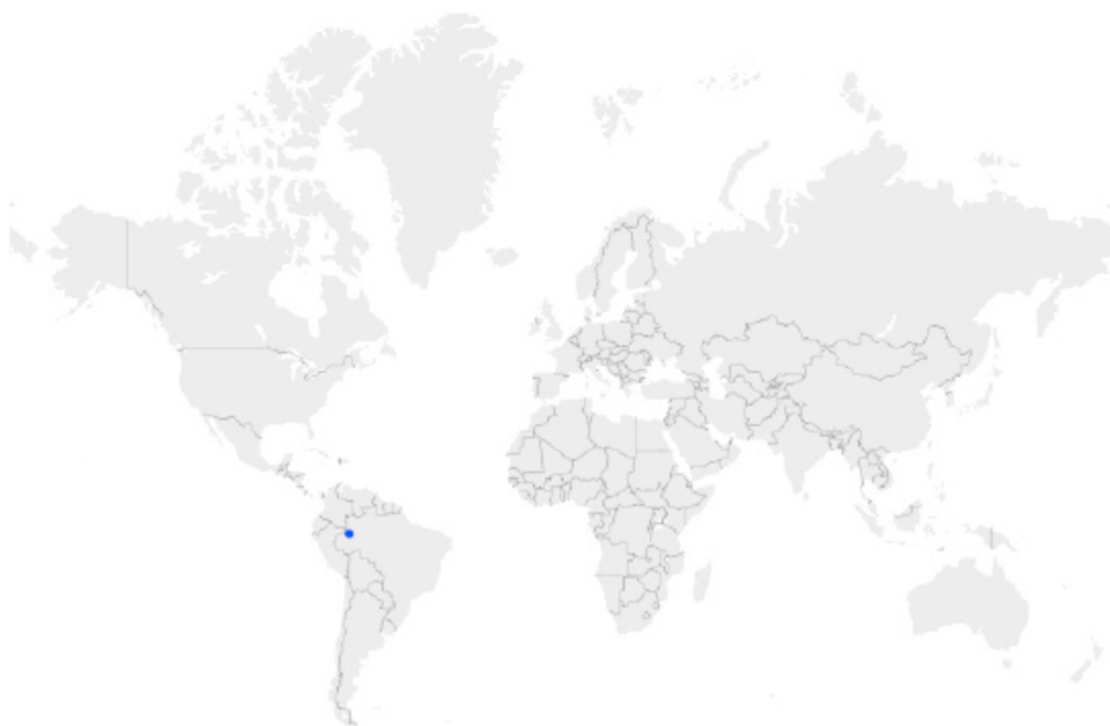

### ***Codinaea assamica***

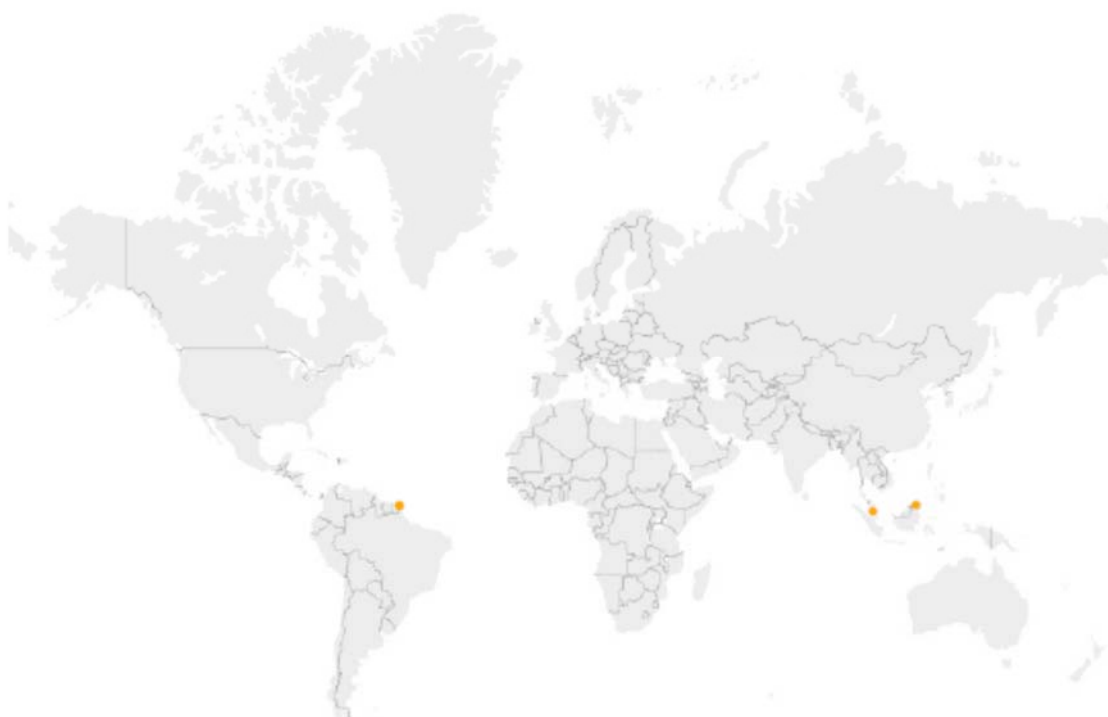

***Codinaea fertilis***

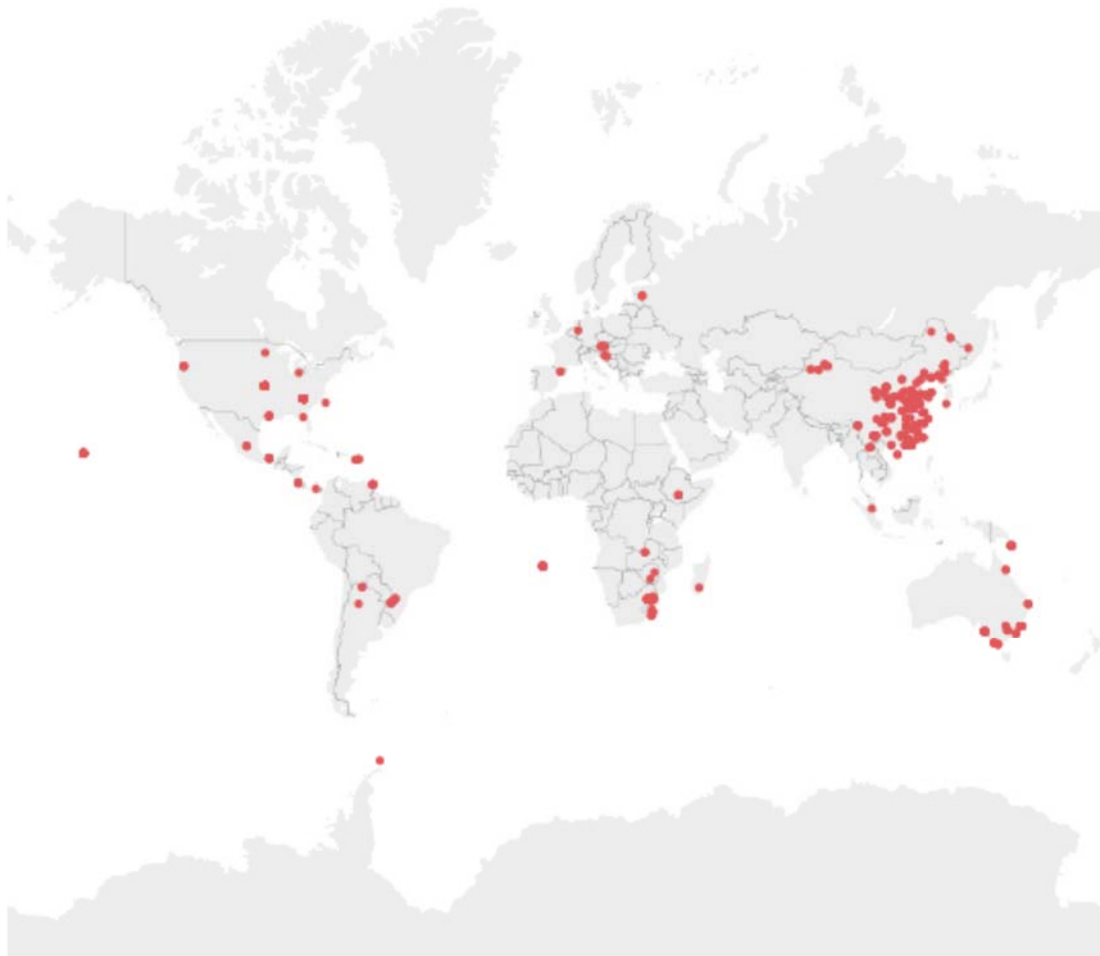

***Codinaea lignicola***

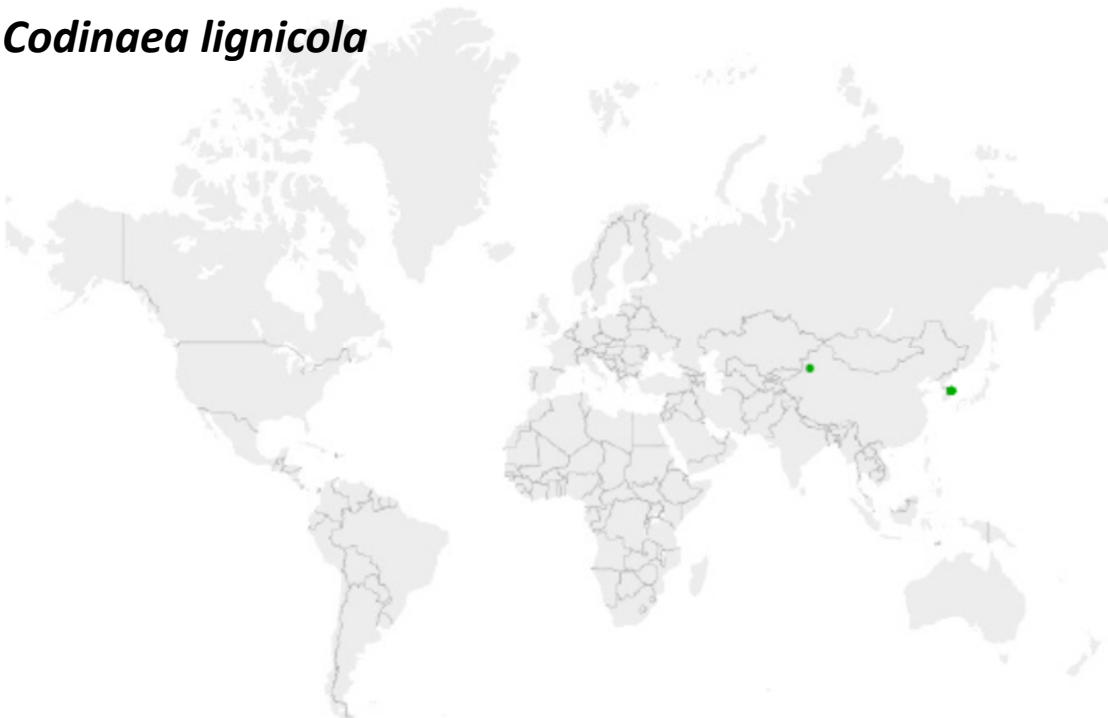

***Codinaea pandanicola***

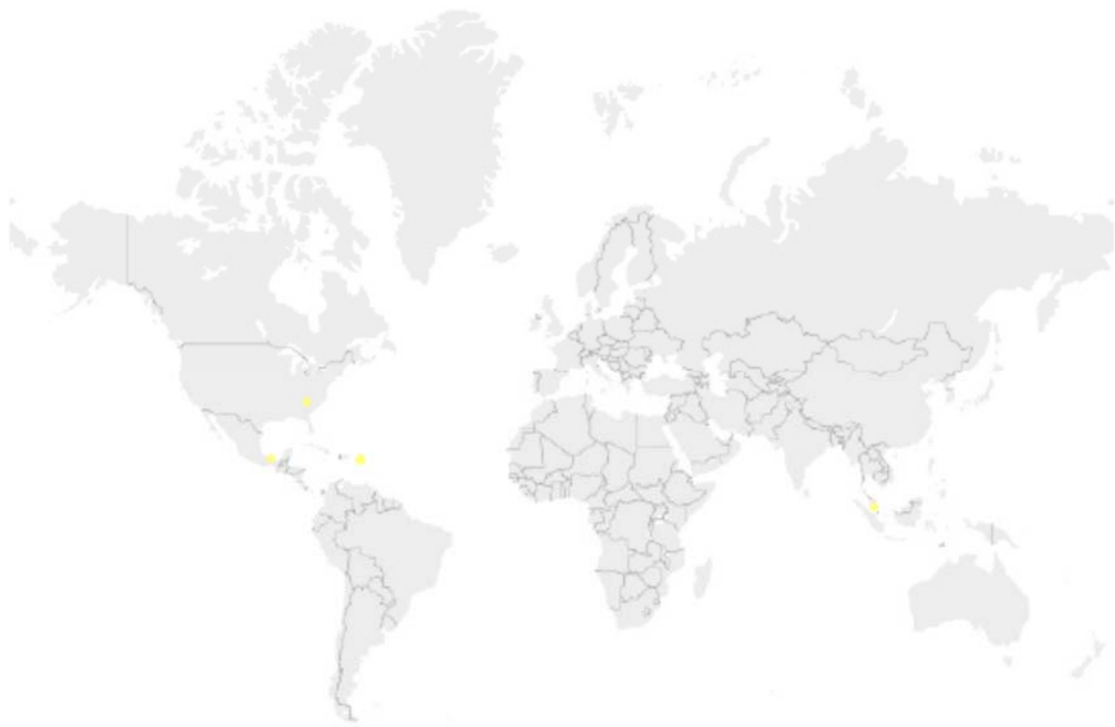

***Codinaea paniculata***

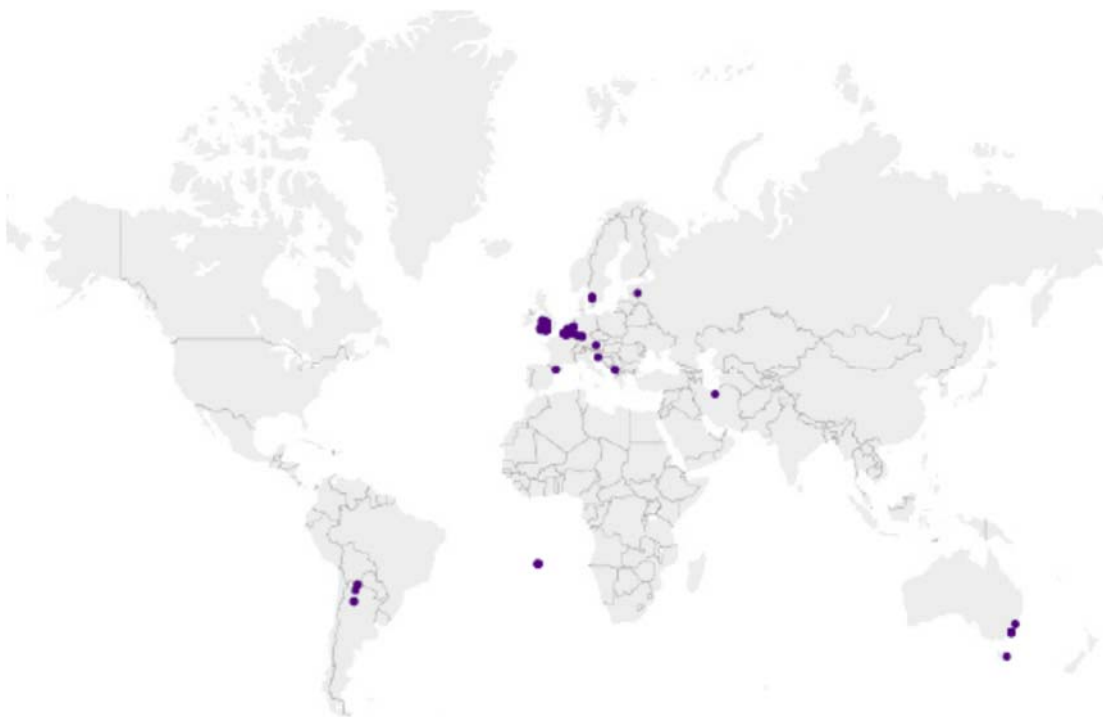

***Codinaea phasma***

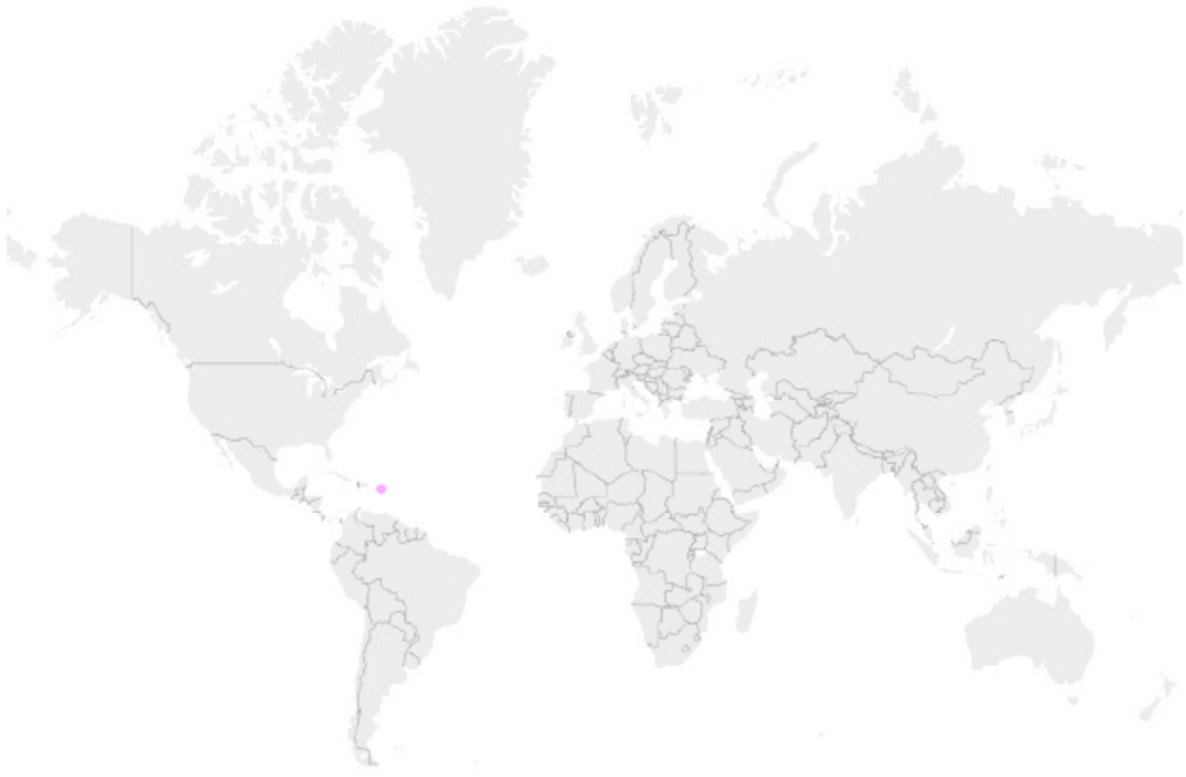

***Codinaea siamensis***

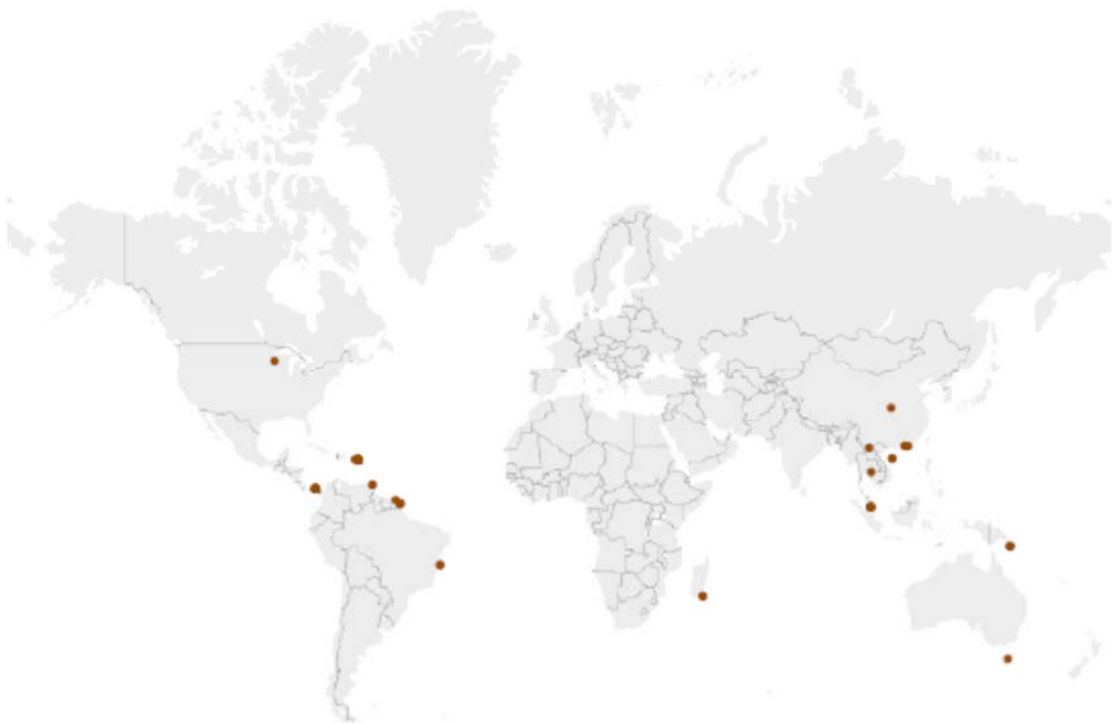

***Codinaea terminalis***

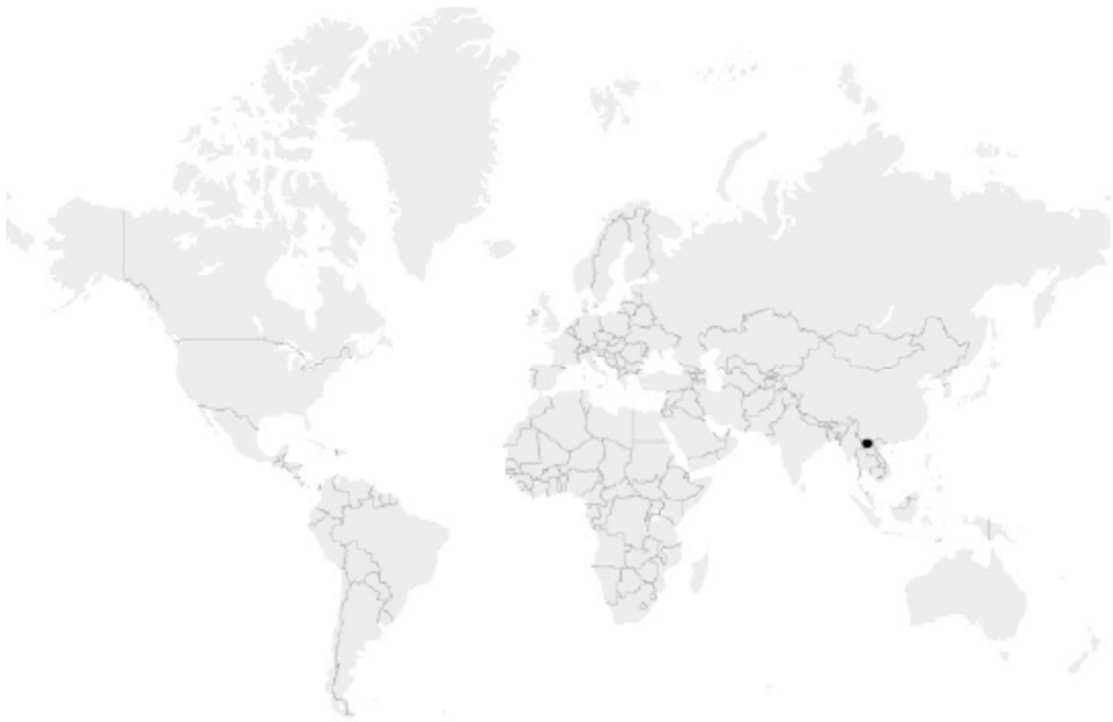

## ***Codinaeella yunnanensis***

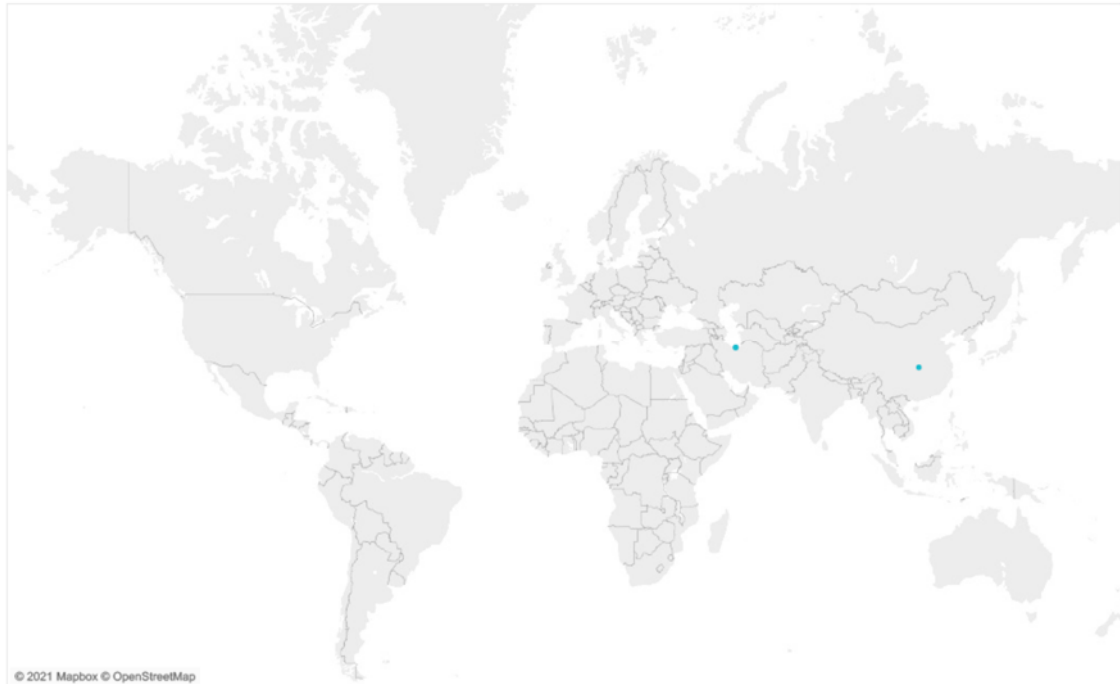

## ***Codinaeella filamentosa***

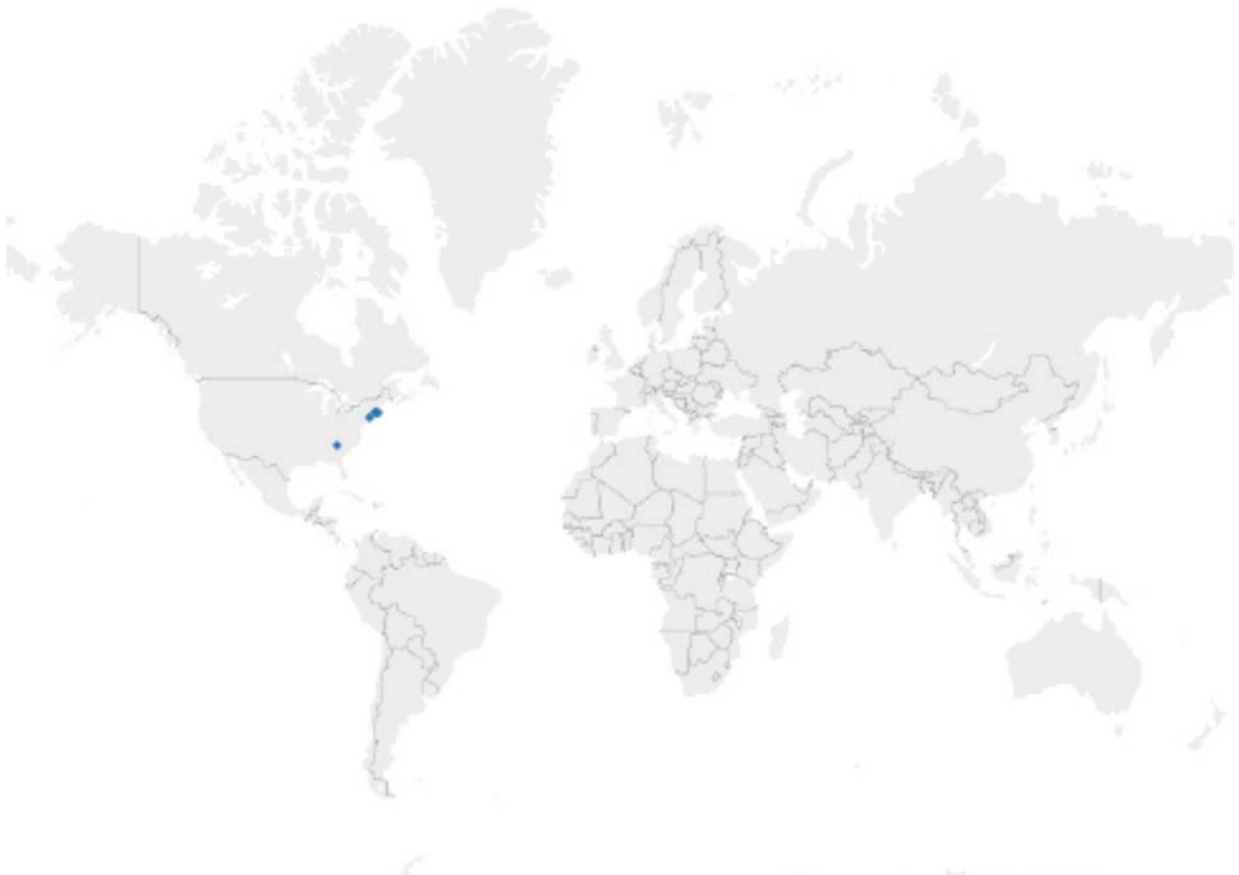

***Codinaeella lambertiae***

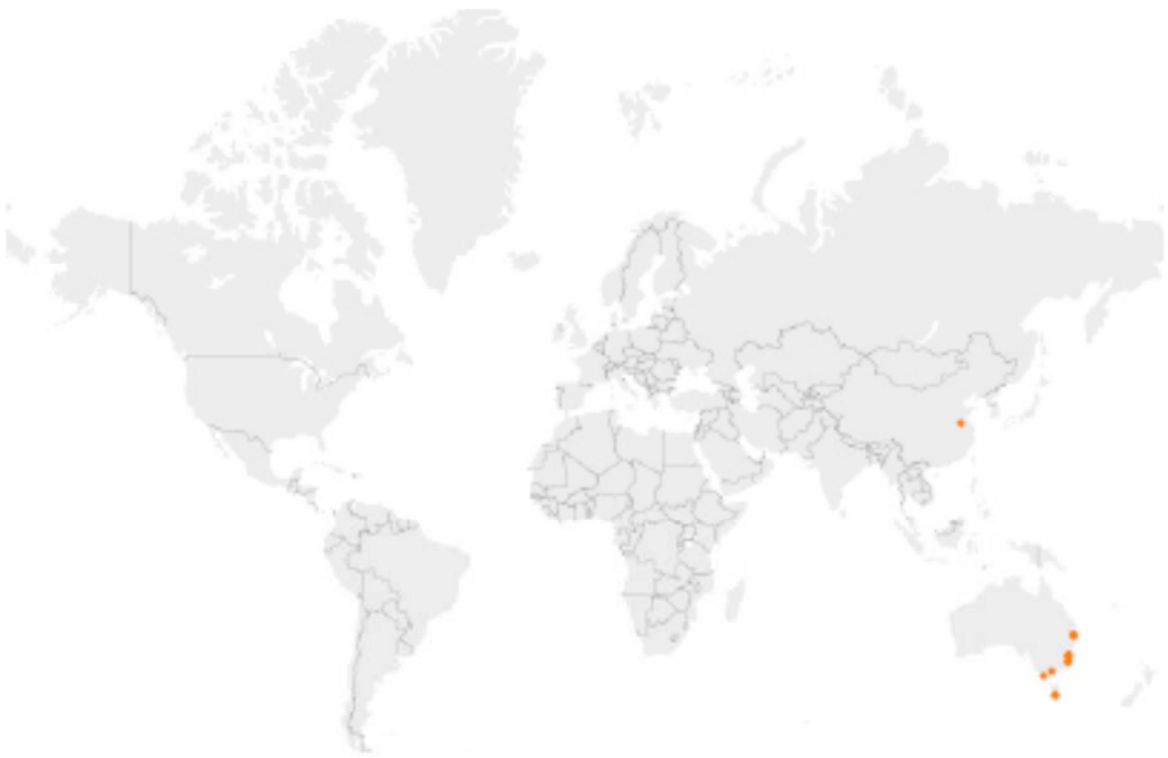

***Codinaeella lutea***

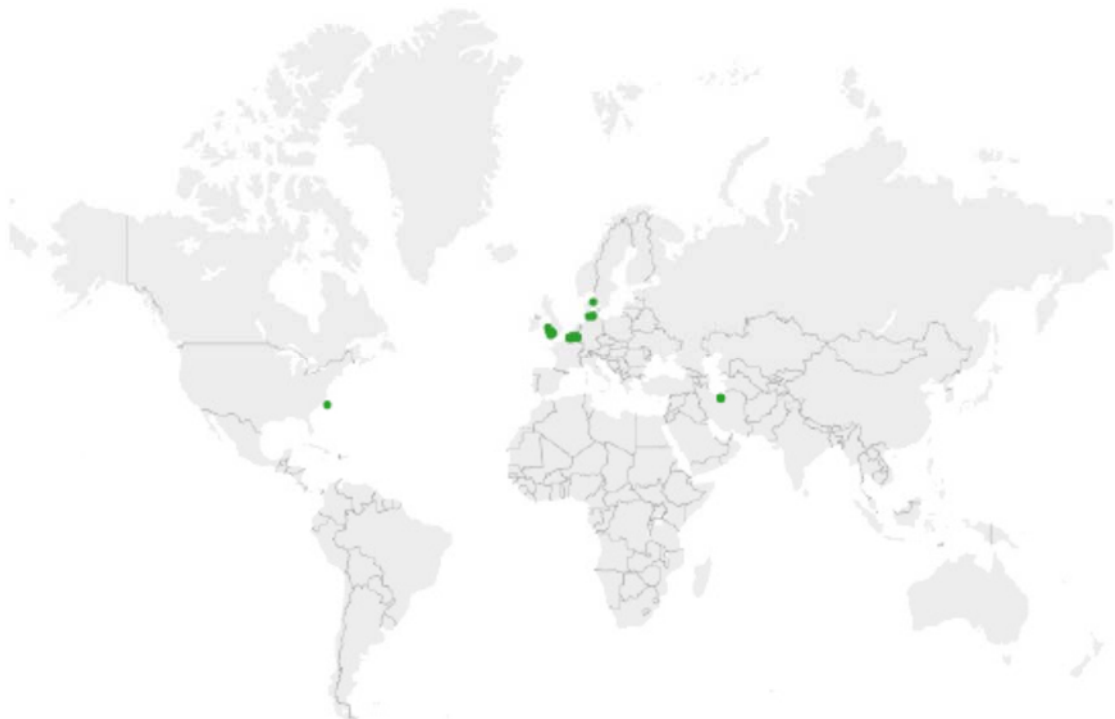

***Codinaeella minuta***

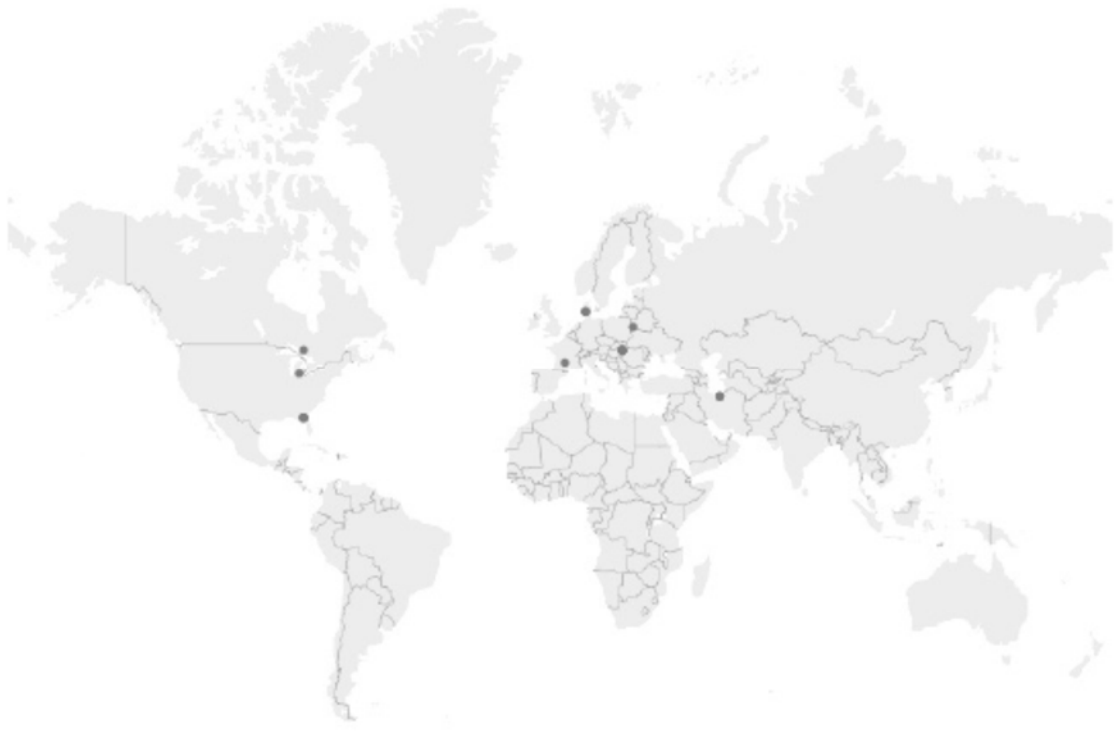

***Codinaeella parvilobata***

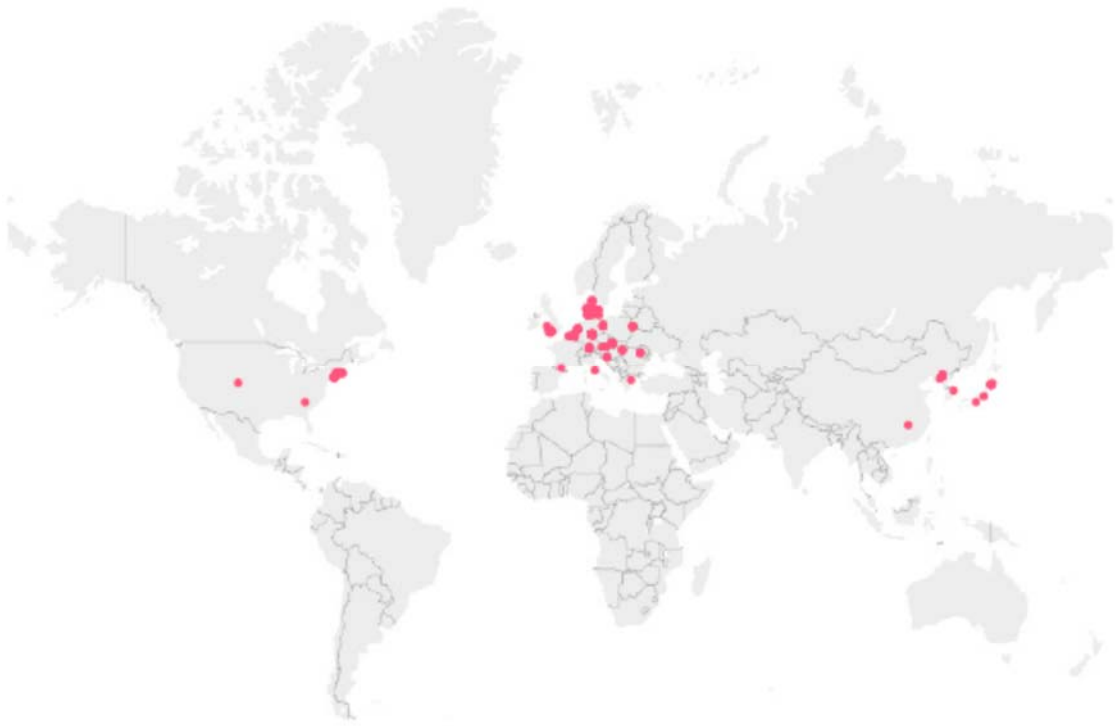



## ***Stilbochaeta aquatica***

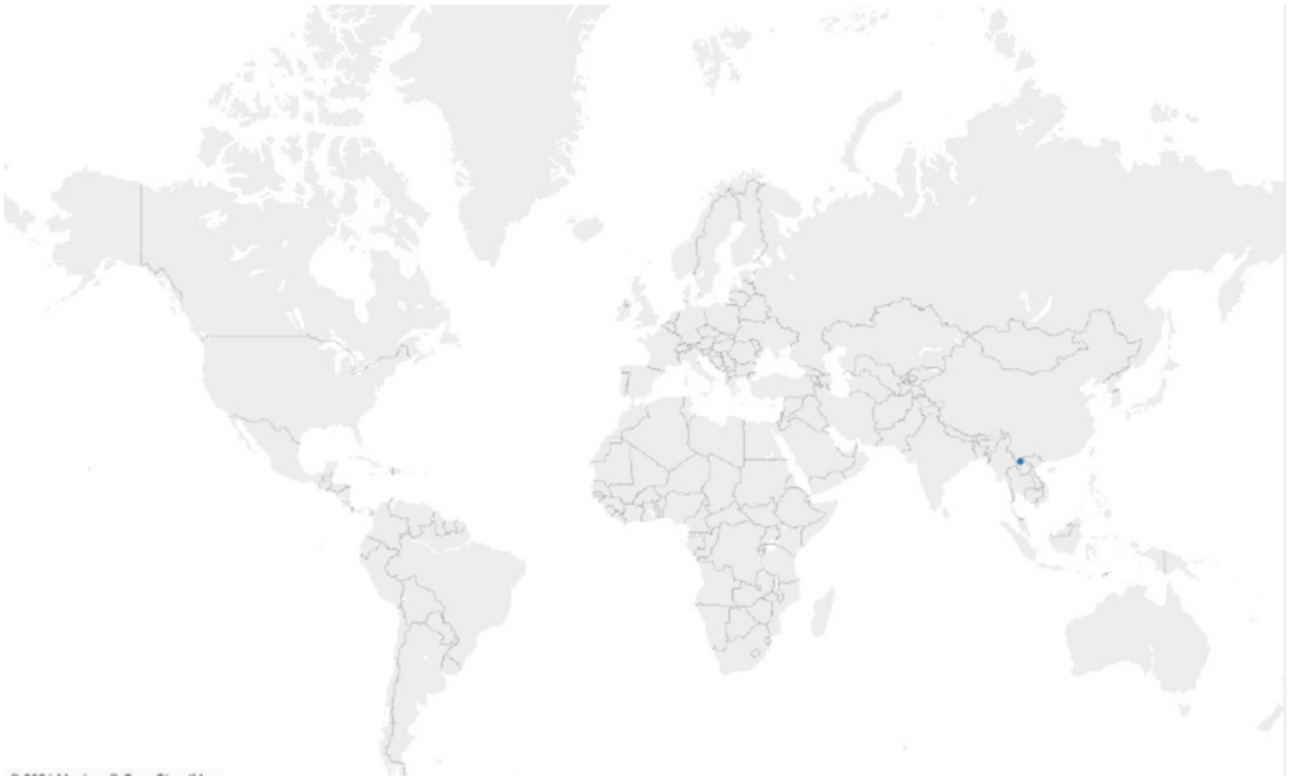

## ***Stilbochaeta cangshanensis***

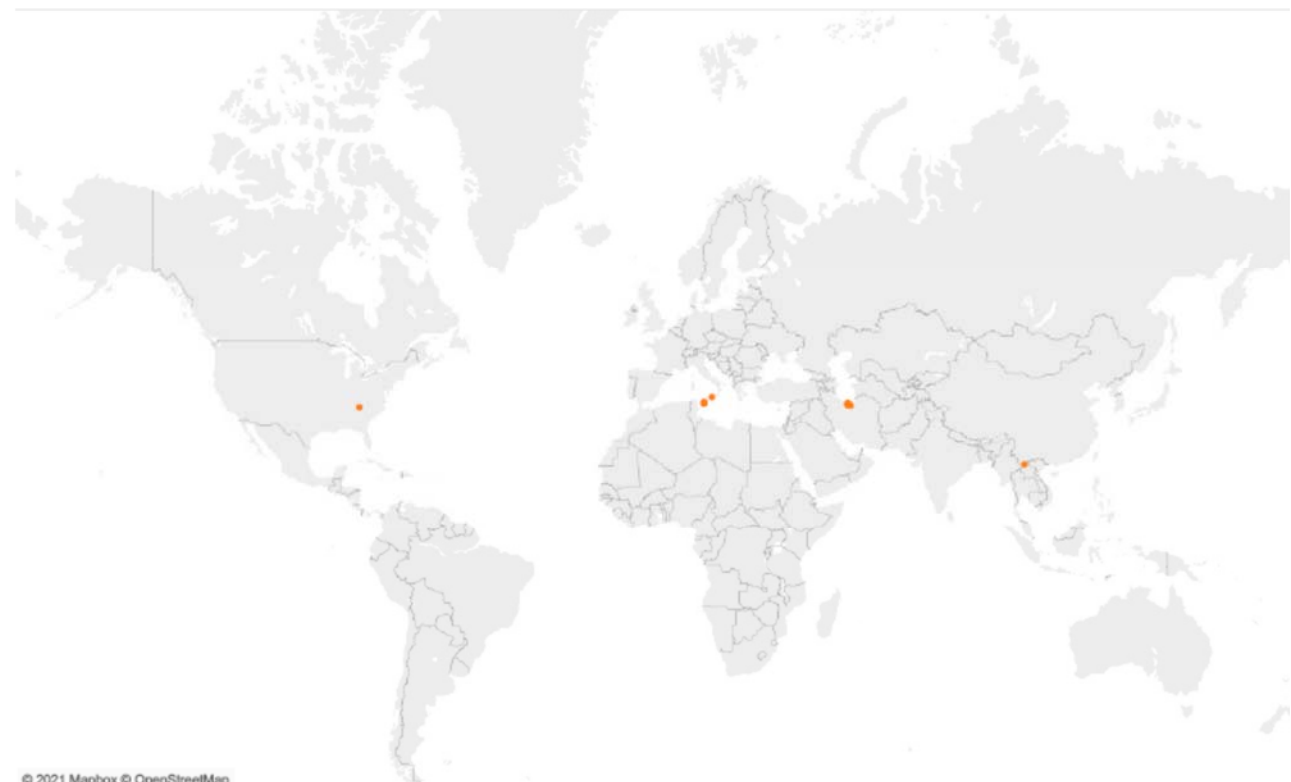

## ***Stilbochaeta malaysiana***

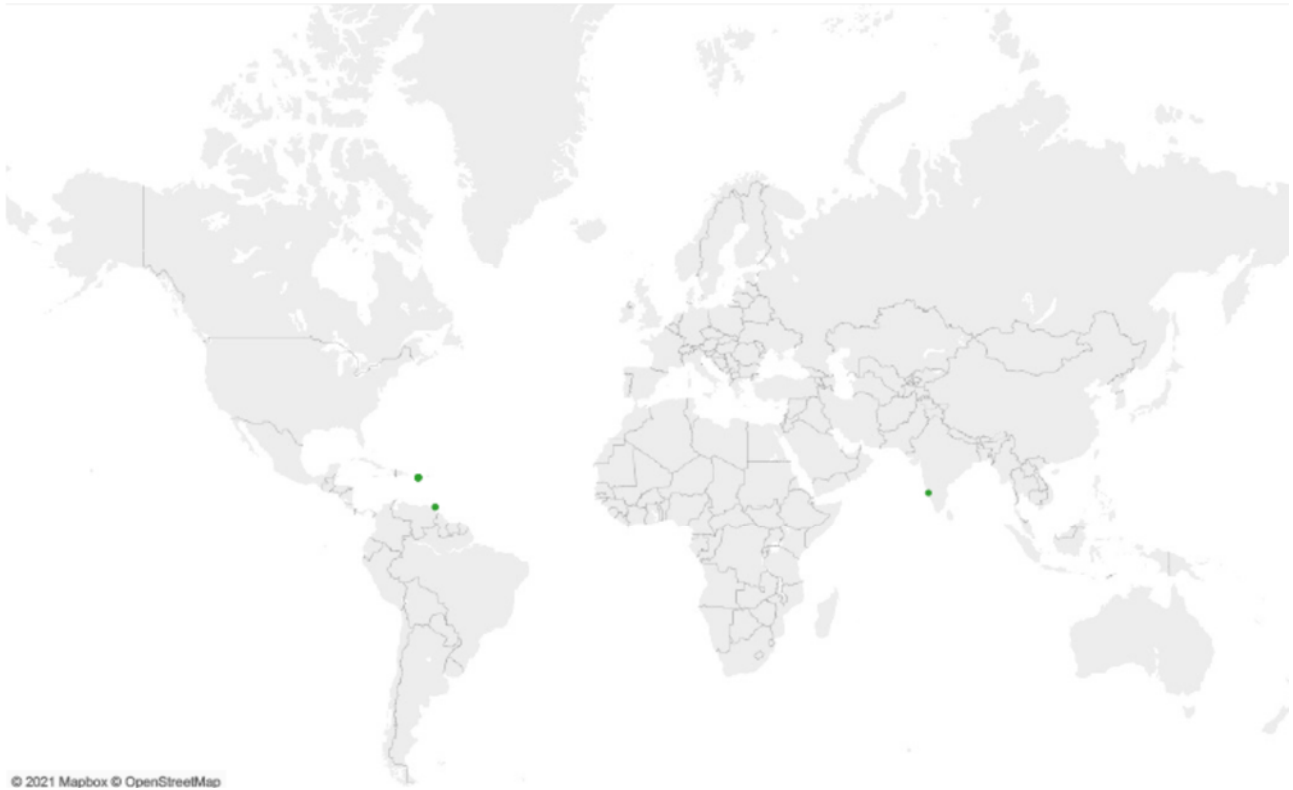

## ***Stilbochaeta novae-guineensis***

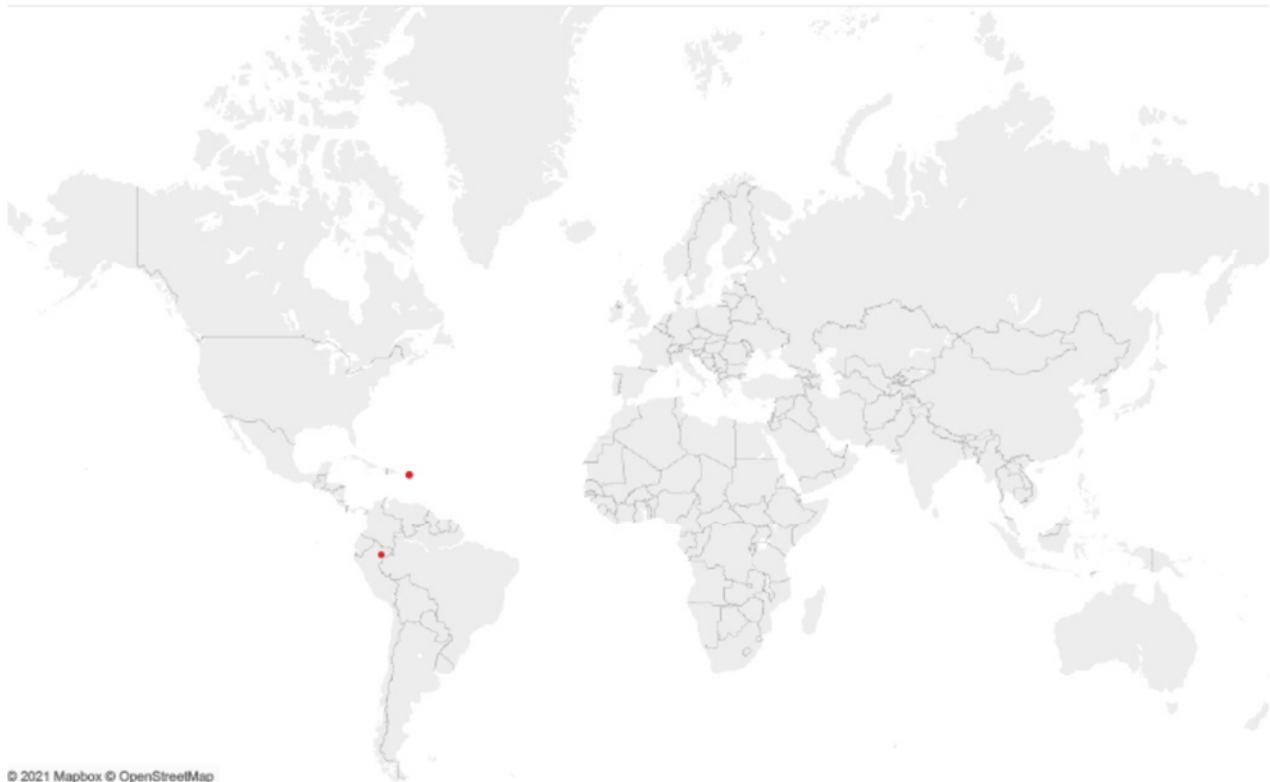

## ***Stilbochaeta ramulosestulosa***

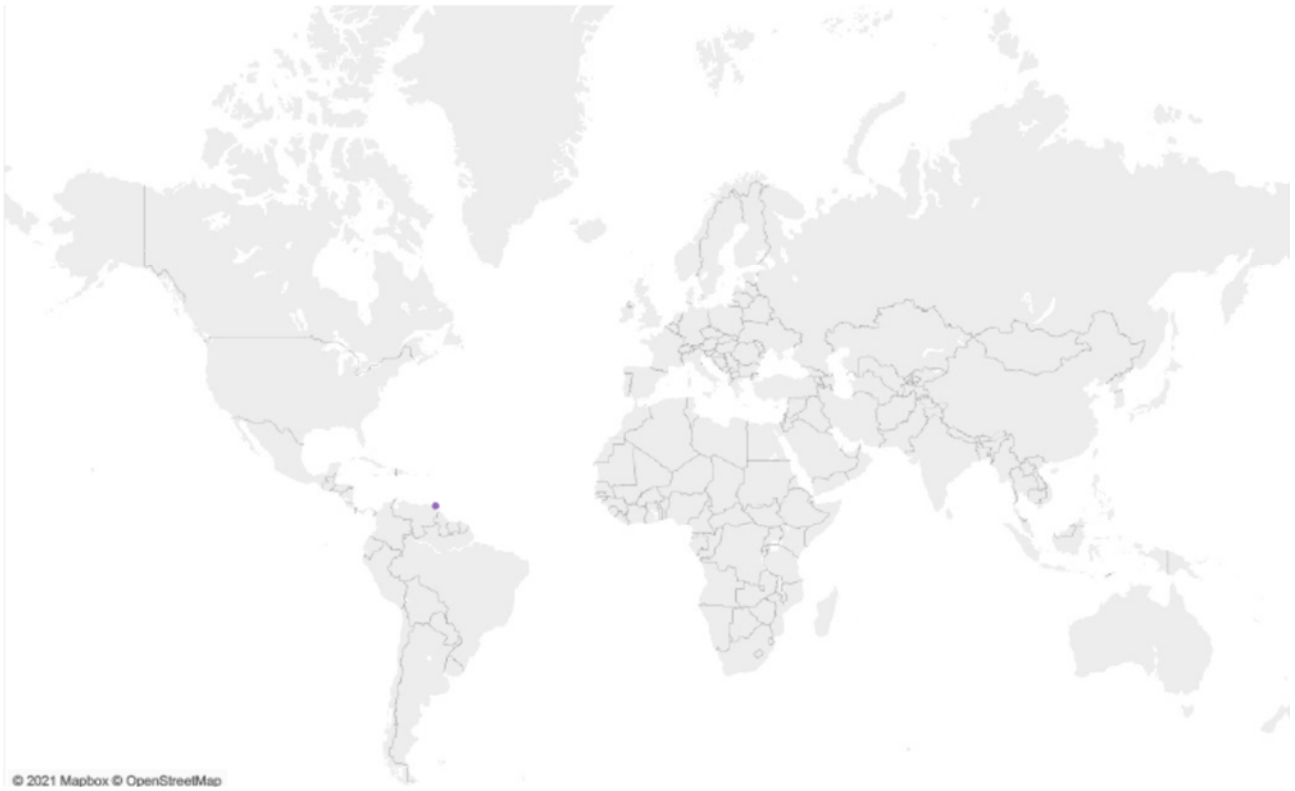

## ***Stilbochaeta septata***

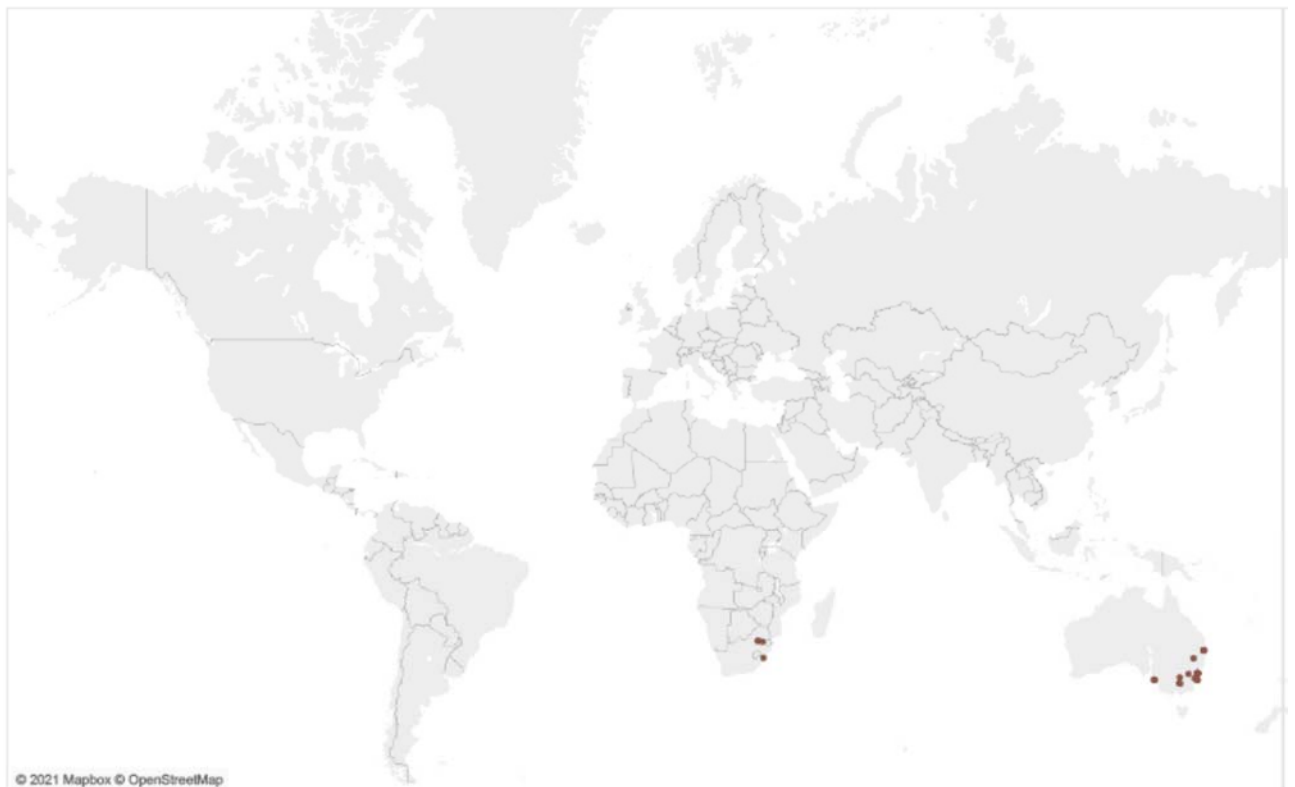

Supplement: s1 [file s1]
