# Supplementary material for: Phylogenetic Reassessment, Taxonomy, and Biogeography of Codinaea and Similar Fungi
Source: MDPI journal article supplement (doi:10.3390/jof7121097), 2021-12-20
Supplement: s1 [file s1]

Table S5. A synopsis table of accepted species of *Codinaeella* based on observations from nature and culture.

| Species                | Setae <sup>1</sup>      | Conidiophores         |           | Phialides            |                               | Conidia          |          | References <sup>1</sup> |  |
|------------------------|-------------------------|-----------------------|-----------|----------------------|-------------------------------|------------------|----------|-------------------------|--|
|                        | Size (μm)               | Size (μm)             | Structure | Position             | Size (μm)                     | Setulae (μm)     | Shape    |                         |  |
| <i>Ca. filamentosa</i> | absent                  | 210–475 × 3.5–4       | branched  | lateral and terminal | 14.5–16.5 × 2–2.7             | up to 11         | falcate  | [32]                    |  |
|                        | absent                  | 160–493 × 2.5–3.5     | branched  | lateral and terminal | 13.5–17 × 2–3                 | 5.5–8.5          | falcate  | This study.*            |  |
| <i>Ca. lambertiae</i>  | absent                  | 100–200 × 3           | branched  | terminal             | (13–)14–15(–18) × (2.5–)3     | 5–8              | falcate  | [10]]*                  |  |
| <i>Ca. lutea</i>       | 125–250 × (3.5–)4.5–5.5 | 39–102 × 3.5–4.5      | simple    | terminal             | 12.5–17.5 × 2–2.5(–3)         | (4.5–)5–8.5(–10) | falcate  | This study.             |  |
|                        | absent                  | 36–83 × 2–4           | simple    | terminal             | 14.5–17 × 2–3                 | 4–7.5            | falcate  | This study.*            |  |
| <i>Ca. mimusopis</i>   | n/a (present)           | 40–150 × 3–4          | simple    | terminal             | (11–)16–18(–20) × 2.5–3(–3.5) | (6–)7(–8)        | fusoid   | [82]*                   |  |
| <i>Ca. minuta</i>      | 123–184 × 3–4.5         | 32–108 × 3–4          | simple    | terminal             | 13–18 × 2.5–3.5               | 5.5–8.5(–10)     | falcate  | This study.             |  |
|                        | absent                  | 46–297(–450) × 3–3.5  | branched  | terminal             | 11.5–17.5(–18) × 2–3          | 4.5–7            | falcate  | This study.*            |  |
| <i>Ca. parvilobata</i> | 140–205 × 4.5–5.5       | 40–117 × 3–4.5(–5)    | simple    | terminal             | 10.5–13.5 × 2–2.5(–3)         | 6.5–9            | falcate  | This study.             |  |
|                        | absent                  | 38–84 × 1.5–3         | simple    | terminal             | 10.5–14 × 2–2.5               | 4–8              | falcate  | This study.*            |  |
| <i>Ca. pini</i>        | n/a ( present)          | 30–100 × 2.5–4        | simple    | terminal             | (12–)13–15 × (2–)2.5(–3)      | 8–9(–10)         | fusoid   | [8]*                    |  |
| <i>Ca. yunnanensis</i> | n/a                     | (62–)83–127 × 4.5–5.5 | simple    | terminal             | 15–17 × 2.5–3.5               | n/a              | fusiform | [29]                    |  |

<sup>1</sup>Note: In vitro observations are marked with an asterisk (\*).
