# Supplementary material for: Phylogenetic Reassessment, Taxonomy, and Biogeography of Codinaea and Similar Fungi
Source: MDPI journal article supplement (doi:10.3390/jof7121097), 2021-12-20
Supplement: s1 [file s1]

Table S6. A synopsis table of accepted species of *Stilbochaeta* based on observations from nature and culture.

| Species                    | Setae                 | Conidiophores         | Phialides |          | Conidia                     | Setulae  | Shape            | Septation      | Reference <sup>1</sup> |
|----------------------------|-----------------------|-----------------------|-----------|----------|-----------------------------|----------|------------------|----------------|------------------------|
|                            | Size (µm)             | Size (µm)             | Structure | Position | Size (µm)                   |          |                  |                |                        |
| <i>S. aquatica</i>         | 120–180 × 3.3–4.2     | 47–68 3–4.5           | simple    | terminal | 14–18 × 2–3                 | 8–13     | falcate          | 0–1-septate    | [28]                   |
|                            | 122–182 × 3.5–4.5     | 45–102 3–4            | simple    | terminal | 13.5–17.5 × 2.5–3           | 5–8.5    | falcate          | 0–1-septate    | This study.*           |
| <i>S. brevisetula</i>      | up to 135 × 4–5       | up to 80 3.5–4        | simple    | terminal | (18–)21.0–24.5(–27) × 3–3.7 | 1.4–2.7  | curved           | 1(2–3)-septate | [2]                    |
|                            | 116–132 × 4–5         | 49–87(–105) × 3.5–4.5 | simple    | terminal | (15.5–)17–22 × 3–4          | 1–1.5    | falcate          | 1-septate      | This study.*           |
| <i>S. cangshanensis</i>    | 125–175 × 4.5–6.5     | 39–53 3.5–4.5         | simple    | terminal | 15–18 × 2.5–3.5             | n/a      | fusiform, curved | 1-septate      | [29]                   |
| <i>S. malaysiana</i>       | up to 200 × up to 5   | up to 100 3–5         | simple    | terminal | 24–32 × 3–4                 | up to 18 | falcate          | 1-septate      | [19]*                  |
| <i>S. novae-guineensis</i> | 100–250 × 4–5         | 40–85 3–4             | simple    | terminal | 13–20 × (2.2–)2.5–3.5(–5)   | 9–16     | falcate          | 0–1-septate    | [17]                   |
|                            | 100–202 × 3–5         | 24–92 × 3–5           | simple    | terminal | 14.5–33 × 2–3.5             | 3–14     | falcate          | 0–1-septate    | This study.*           |
| <i>S. ramulosestula</i>    | up to 300 × up to 5.5 | up to 90 4–5          | simple    | terminal | 16–22 × 3–4                 | up to 18 | falcate          | 1-septate      | [19]*                  |
| <i>S. septata</i>          | up to 105 × 4–6       | 30–50 4–6             | simple    | terminal | (14.5–)17.5–23 × 2          | 5.5–10   | falcate          | 1–2-septate    | [31]                   |
|                            | 245–260 × 3–5         | 34–37 3–4             | simple    | terminal | 14–15.5 × 2–2.5(–3)         | 5.5–9    | falcate          | 1-septate      | This study.*           |
| <i>S. submersa</i>         | present               | 62–122(–152) 3–5      | simple    | terminal | 13.5–16.5 × 2.5–3.5         | n/a      | fusiform, curved | 0–1-septate    | [29]                   |

<sup>1</sup>Note: In vitro observations are marked with an asterisk (\*).
