# Supplementary material for: Phylogenetic Reassessment, Taxonomy, and Biogeography of Codinaea and Similar Fungi
Source: MDPI journal article supplement (doi:10.3390/jof7121097), 2021-12-20
Supplement: s1 [file s1]

Table S4. A synopsis table of accepted species of *Codinaea* based on observations from nature and culture.

| Species                 | Setae<br>Size (μm)    | Conidiophores<br>Size (μm) | Phialides<br>Structure Position             | Conidia<br>Size (μm)         | Setulae             | Shape                   | Reference <sup>1</sup> |
|-------------------------|-----------------------|----------------------------|---------------------------------------------|------------------------------|---------------------|-------------------------|------------------------|
| <i>C. amazonensis</i>   | absent                | 150–250 × (3–)4.5–6        | simple lateral on stalks                    | 9–17 × 1.5–2.5               | 5–10                | lunate                  | [128]                  |
|                         | absent                | 260–320 × 4.5–6.5          | simple lateral on stalks                    | 9–11.5 × 1.5–2(–2.5)         | 5.5–9               | falcate                 | This study.*           |
| <i>C. aristata</i>      | 250 and longer        | up to 100                  | simple terminal                             | 12–14 × 2                    | 4–6 apical, 1 basal | falcate                 | [1]                    |
| <i>C. assamica</i>      | up to 400 × up to 7.8 | up to 140 × 4.5            | simple terminal                             | 14.6–16.8 × 2.6–2.8          | 9.6–12.8            | falcate                 | [2]                    |
|                         | 273–360 × 5–7         | 42–125 × 3.5–4.5(–5)       | simple terminal                             | 14–18 × 2.5–3.5              | (5.5–)7–13.5        | falcate                 | This study.*           |
| <i>C. dwaya</i>         | absent                | 170–290 × 5.5–9            | simple terminal                             | 15–16 × 15–16                | numerous            | globose to pyriform     | [120]                  |
|                         | absent                | (33–)74–254 × 5–10(–11.5)  | simple terminal                             | 15–16 × 15–16                | numerous            | globose to pyriform     | This study.*           |
| <i>C. ellipsoidea</i>   | absent                | 254–288 × 8–10             | simple terminal                             | 13–15 × 5.5–6.5              | n/a                 | ellipsoidal             | [29]                   |
| <i>C. fertilis</i>      | up to 310 × up to 5.6 | up to 112 × up to 4.8      | simple terminal                             | 9–15.4 × 2–3                 | 5–10                | falcate                 | [2]                    |
|                         | 152–340 × 4.5–6.6     | 66–146 × 4–5(–5.5)         | simple terminal                             | (10–)11–14.5 × 3.5–4.5       | 3.5–6.5(–9)         | falcate                 | This study.*           |
| <i>C. gonytrichodes</i> | absent                | 173–490 × 3.8–7            | branched lateral on collar hyphae, terminal | 10–13(16.4) × 1.2–2.3        | 5.3–13.8            | falcate                 | [6]                    |
|                         | absent                | 160–355 × 4–7              | branched lateral on collar hyphae, terminal | 12–14.5 × 2–2.5(–3)          | 7.5–11.5            | falcate                 | This study.*           |
| <i>C. lignicola</i>     | absent                | 204–276 × 7.5–8.5          | simple terminal                             | 13–15 × 4.5–5.5              |                     | navicular to fusiform   | [29]                   |
| <i>C. pandanicola</i>   | n/a                   | up to 260 × n/a            | simple terminal                             | 16–26 × 4–6                  | 8–13.5              | falcate                 | [48]                   |
| <i>C. paniculata</i>    | 230–290 × 6–7.5       | 62–127 × 3.5–4.5           | simple terminal                             | 13.5–17(–17.5) × (2–)2.5–3.5 | 5–8                 | falcate                 | [46]                   |
|                         | absent                | 95–150(–195) × 3.5–4.5     | simple terminal                             | 11–15.5(–17) × 2.5–3.5       | 3.5–5.5(–7.5)       | falcate                 | [46]*                  |
| <i>C. phasma</i>        | 160–380 × 5–10        | 35–97 × 2.5–4.5            | simple terminal                             | 13.5–18 × 3–4                | 5–13                | oblong to falcate       | This study             |
|                         | 97–236 × 3.5–6        | 44–104 × 3.5–7             | simple terminal                             | 12–18.5 × 4.5–8              | 3.5–11              | irregularly ellipsoidal | This study.*           |
| <i>C. siamensis</i>     | 165–365 × 3–6         | 60–100 × 2–5               | simple terminal                             | 15.5–21 × 2.5–4              | 7–12                | cylindrical or fusiform | [47]                   |
|                         | 240–330 × 6.5–9       | 67–125(–153) × 3.5–5       | simple terminal                             | 11.5–14.5 × 2.5–4            | (4.5–)5–8.5(–10)    | falcate                 | This study.*           |
| <i>C. terminalis</i>    | 150–320 × 3.7–9.4     | 31–171 × 2.7–8.7           | simple terminal                             | 14.7–20.7 × 2.9–4.2          | 4–9.5               | long fusiform, curved   | [30]                   |
| <i>C. vermisporea</i>   | absent                | up to 150 × 3–4            | simple terminal                             | 31–55 × 2.5–3.5              | 1.5–4.6             | lunate to vermiform     | [50]*                  |

Note: <sup>1</sup>In vitro observations are marked with an asterisk (\*).
