# Supplementary material for: Phylogenetic Reassessment, Taxonomy, and Biogeography of Codinaea and Similar Fungi
Source: MDPI journal article supplement (doi:10.3390/jof7121097), 2021-12-20
Supplement: s1 [file s1]

Table S1. Taxa, isolate information and accession numbers for sequences retrieved from GenBank. Taxonomic novelties are given in bold.

| Taxon <sup>1</sup>                                    | Strain                 | Status <sup>2</sup> | Country         | Host                                           | Substrate         | GenBank accessions |          |          |
|-------------------------------------------------------|------------------------|---------------------|-----------------|------------------------------------------------|-------------------|--------------------|----------|----------|
|                                                       |                        |                     |                 |                                                |                   | ITS                | 28S      | tef1-α   |
| <i>Adautomilanezia caesalpiniae</i>                   | CC-LAMIC 102/12        | T                   | Brazil          | <i>Caesalpinia echinata</i>                    | wood              | KX821777           | KU170671 | —        |
| <i>Anacacumisporium appendiculatum</i>                | HMAS 245593            | T                   | China           | broad-leaved tree                              | dead stems        | KP347129           | KT001553 | —        |
| <i>Anacacumisporium appendiculatum</i>                | HMAS 245602            |                     | China           | broad-leaved tree                              | dead stems        | KT001556           | KT001554 | —        |
| <i>Brunneodinemasporium brasiliense</i>               | CBS 112007             | T                   | Brazil          | unidentified                                   | decaying leaf     | JQ889272           | JQ889288 | —        |
| <i>Brunneodinemasporium jonesii</i>                   | GZCC 16-0050           | T                   | China           | unidentified                                   | decaying wood     | KY026058           | KY026055 | —        |
| <i>Cacumisporium capitulatum</i>                      | FMR 11339              | T                   | Spain           | unidentified                                   | decaying wood     | HF677176           | HF677190 | —        |
| <i>Calvolachnella guayuninis</i>                      | CBS 134695             | T                   | Uruguay         | <i>Myrcianthes pungens</i>                     | bark              | KJ834524           | KJ834525 | —        |
| <i>Catenularia cubensis</i>                           | S.M.H. 3258            |                     | Costa Rica      | unidentified                                   | decaying wood     | MW987826           | AF466067 | —        |
| <i>Catenularia catenulata</i>                         | DLUCC 0891             | T                   | China           | unidentified                                   | submerged wood    | MK828637           | MK835838 | —        |
| <i>Chaetosphaeria fusiformis</i>                      | CBS 101429             |                     | Czech Republic  | <i>Abies alba</i>                              | decaying bark     | AF178554           | AF178554 | —        |
| <i>Chaetosphaeria innumera</i>                        | M.R. 1175              |                     | Czech Republic  | <i>Fagus sylvatica</i>                         | decaying wood     | AF178551           | AF178551 | —        |
| <i>Chaetosphaeria lignomollis</i>                     | S.M.H. 3015            | T                   | Puerto Rico     | unknown                                        | decaying wood     | EU037896           | AF466073 | —        |
| <i>Chaetosphaeria myriocarpa</i>                      | CBS 264.76             | N                   | The Netherlands | unidentified                                   | decaying wood     | AF178552           | AF178552 | —        |
| <i>Chaetosphaeria pygmaea</i>                         | M.R. 1365              |                     | Czech Republic  | <i>Fagus sylvatica</i>                         | decaying wood     | AF178545           | AF178545 | —        |
| <i>Chloridium caesium</i>                             | CBS 102339             |                     | Austria         | <i>Salix cinerea</i>                           | decaying wood     | AF178564           | AF178564 | —        |
| <i>Chloridium virescens</i>                           | CBS 152.53             |                     | France          | <i>Acer</i> sp.                                | unknown           | MH857142           | MH868678 | —        |
| <i>Chloridium gonytrichii</i>                         | CBS 195.60             |                     | South Africa    | unidentified                                   | unknown           | MH857954           | MH869503 | —        |
| <i>Chloridium submersum</i>                           | MFLUCC 16-1344         | T                   | China           | unidentified                                   | submerged wood    | MN860551           | MN860556 | —        |
| <b><i>Codinaea ellipsoidea</i></b>                    | MFLUCC 18-1574         | T                   | China           | unidentified                                   | submerged wood    | MK828628           | MK835828 | —        |
| <b><i>Codinaea ellipsoidea</i></b>                    | DLU 0104               |                     | China           | unidentified                                   | submerged wood    | MK828626           | MK835826 | —        |
| <b><i>Codinaea ellipsoidea</i></b>                    | KUMCC 15-0279          |                     | China           | unidentified                                   | submerged wood    | MK828627           | MK835827 | —        |
| <b><i>Codinaea ellipsoidea</i></b>                    | DLU 229                |                     | China           | unidentified                                   | submerged wood    | MK828629           | MK835829 | —        |
| <b><i>Codinaea lignicola</i></b>                      | DLUCC 0899             | T                   | China           | unidentified                                   | submerged wood    | MK828630           | MK835830 | MN194081 |
| <b><i>Codinaea pandanicola</i></b>                    | KUMCC 16-0153          | T                   | China           | <i>Pandanus</i> sp.                            | dead leaf         | MH388338           | MH376710 | MH388373 |
| <b><i>Codinaea siamensis</i></b>                      | MFLUCC 15-0614         | T                   | Thailand        | unidentified                                   | submerged twig    | KX609955           | KX609952 | —        |
| <b><i>Codinaea siamensis</i></b>                      | MFLUCC 16-0371         |                     | Thailand        | <i>Pandanus</i> sp.                            | dead leaf         | MH388339           | MH376711 | MH388374 |
| <b><i>Codinaea terminalis</i></b>                     | GZCC 18-0085           | T                   | China           | unidentified                                   | decaying leaves   | MN104613           | MN104624 | —        |
| <b><i>Codinaea vermispora</i></b>                     | CGMCC 3.19632          | T                   | China           | unidentified                                   | submerged leaves  | MH758194           | MH758207 | —        |
| <b><i>Codinaea lutea</i></b>                          | GZCC 18-0017           |                     | China           | unidentified                                   | decaying leaves   | MN104609           | MN104620 | —        |
| <b><i>Codinaea yunnanensis</i></b>                    | MFLUCC 17-0468         | T                   | China           | unidentified                                   | submerged wood    | MK828623           | MK835823 | MN194076 |
| <i>Coniomyces pseudotransvaalensis</i>                | HHUF 29956             | T                   | Japan           | <i>Machilus japonica</i>                       | dead twig         | LC001710           | LC001708 | —        |
| <i>Cryptophiale hamulata</i>                          | MFLUCC 18-0098         | E                   | Thailand        | unknown                                        | decaying leaf     | —                  | MG386756 | —        |
| <i>Cryptophiale udagawae</i>                          | GZCC 18-0047           |                     | China           | unidentified                                   | decaying wood     | MN104608           | MN104619 | —        |
| <i>Cryptophialoidea fasciculata</i>                   | MFLU 18-1499           |                     | Thailand        | unknown                                        | submerged wood    | MH758195           | MH758208 | —        |
| <i>Dictyocheata brevis</i>                            | GZCC 18-0096           | T                   | China           | unidentified                                   | decaying wood     | MN104614           | MN104625 | —        |
| <i>Dictyocheata callimorpha</i>                       | ICMP 15155             |                     | New Zealand     | unidentified                                   | decaying wood     | MT454484           | MT454499 | MT454674 |
| <i>Dictyocheata fuegiana</i>                          | ICMP 15153             | T                   | New Zealand     | unidentified                                   | decaying wood     | MT454487           | EF063574 | MT454677 |
| <i>Dictyocheata querna</i>                            | CBS 145503             |                     | Czech Republic  | <i>Quercus cerris</i>                          | acorn             | MT454489           | MT454503 | MT454679 |
| <i>Dictyocheata montana</i>                           | CBS 145342             | E                   | Czech Republic  | <i>Fagus sylvatica</i>                         | decaying cupule   | MT454488           | MT454502 | MT454678 |
| <i>Dictyocheata detriticola</i>                       | ICMP 14948             | T                   | New Zealand     | <i>Metrosideros</i> sp.                        | fallen leaves     | MT454486           | MT454501 | MT454676 |
| <i>Dinemasporium cruciferum</i>                       | HHUF 30001             |                     | Japan           | <i>Arundo donax</i>                            | unknown           | AB900895           | AB934039 | AB934089 |
| <i>Dinemasporium decipiens</i>                        | CBS 592.73             |                     | Suriname        | <i>Elaeis guineensis</i>                       | soil under        | JQ889275           | JQ889291 | —        |
| <i>Dinemasporium pseudoindicum</i>                    | CBS 127402             | T                   | USA             | tallgrass prairie                              | soil under        | JQ889277           | JQ889293 | —        |
| <i>Ellisembia aurea</i>                               | CBS 144403             | T                   | France          | <i>Sambucus nigra</i>                          | decaying wood     | MH836375           | MH836376 | —        |
| <i>Eucalyptostroma eucalypti</i>                      | CBS 142074             | T                   | Malaysia        | <i>Eucalyptus pellita</i>                      | leaf spots        | KY173408           | KY173500 | —        |
| <i>Exserticlavula vasiformis</i>                      | TAMA 450               |                     | Japan           | unidentified                                   | plant debris      | —                  | AB753846 | —        |
| <i>Fuscocatenua submersa</i>                          | MFLUCC 18-1342         | T                   | China           | unidentified                                   | submerged wood    | MK828634           | MK835835 | MN194085 |
| <i>Infundibulomyces cupulatus</i>                     | BCC 11929              | T                   | Thailand        | <i>Lagerstroemia</i> sp.                       | dead leaf         | EF113976           | EF113979 | —        |
| <i>Infundibulomyces oblongisporus</i>                 | BCC 13400              | T                   | Thailand        | unidentified, angiosperm                       | leaf litter       | EF113977           | EF113980 | —        |
| <i>Kionochaeta castaneae</i>                          | GZCC 18-0025           | T                   | China           | <i>Castanea mollissima</i>                     | decaying seed she | MN104610           | MN104621 | —        |
| <i>Kionochaeta microspora</i>                         | GZCC 18-0036           | T                   | China           | unidentified                                   | decaying wood     | MN104607           | MN104618 | —        |
| <i>Menisporopsis anisopora</i>                        | CBS 109475             | T                   | Venezuela       | <i>Wettinia praemorsa</i>                      | decaying petiole  | MH862827           | MH74421  | —        |
| <i>Menisporopsis breviseta</i>                        | GZCC 18-0071           | T                   | China           | unknown                                        | decaying leaves   | MN104612           | MN104623 | —        |
| <i>Menisporopsis dushanensis</i>                      | GZCC 18-0084           | T                   | China           | unidentified                                   | decaying leaves   | MN104615           | MN104626 | —        |
| <i>Nawawia filiformis</i>                             | MFLUCC 17-2394         |                     | Thailand        | unidentified                                   | decaying wood     | MH758196           | MH758209 | —        |
| <i>Neopseudolachnella acutispora</i>                  | MAFF 244358            | T                   | Japan           | <i>Pleioblastus chino</i>                      | dead twigs        | AB934065           | AB934041 | AB934091 |
| <i>Neopseudolachnella magnispora</i>                  | MAFF 244359            | T                   | Japan           | <i>Sasa kurlensis</i>                          | dead twigs        | AB934066           | AB934042 | AB934092 |
| <i>Paliphora intermedia</i>                           | CBS 896.97             | I                   | Australia       | unidentified                                   | leaf litter       | MH862682           | EF204501 | —        |
| <i>Paragaumannomyces garethjonesii</i>                | MFLUCC 15-1012         | T                   | Thailand        | Fabaceae                                       | seed pod          | KY212751           | KY212759 | —        |
| <i>Paragaumannomyces sabinianus</i>                   | ILLS121384             | T                   | USA             | unidentified                                   | decaying wood     | MT118243           | MT118225 | —        |
| <i>Paragaumannomyces panamensis</i>                   | S.M.H. 3596            | T                   | Panama          | unidentified                                   | decaying wood     | AY906948           | MT118218 | —        |
| <i>Paragaumannomyces rubicundus</i>                   | S.M.H. 3221            | T                   | Costa Rica      | unidentified                                   | decaying wood     | MT118242           | MT118224 | —        |
| <i>Paragaumannomyces raciborskii</i>                  | S.M.H. 3119            |                     | Puerto Rico     | unidentified                                   | decaying wood     | AY906953           | AY436402 | —        |
| <i>Phaeostalagnus cyclosporus</i>                     | CBS 663.70             |                     | The Netherlands | <i>Quercus</i> sp.                             | decaying bark     | MH589892           | —        | —        |
| <i>Phialosporostilbe scutiformis</i>                  | MFLUCC 17-0227         | T                   | China           | unidentified                                   | submerged wood    | MH758194           | MH758207 | —        |
| <i>Phialogeniculata guadalcanalensis</i> <sup>o</sup> | MFLUCC 18-0260         | T                   | Thailand        | unidentified                                   | decaying wood     | MK828625           | MK835825 | MN194078 |
| <i>Phialoturbella aseptata</i>                        | GZCC 18-0044           | T                   | China           | unidentified                                   | decaying wood     | MN104611           | MN104622 | —        |
| <i>Phialoturbella lunata</i>                          | MFLUCC 18-0642         | T                   | China           | unidentified                                   | submerged wood    | MK828624           | MK835824 | MN194077 |
| <i>Polynema podocarp</i>                              | CBS 144415             | T                   | New Zealand     | <i>Podocarpus totara</i>                       | unknown           | MH327797           | MH327833 | —        |
| <i>Pseudodinemasporium fabiforme</i>                  | CBS 140010             | T                   | Malaysia        | <i>Acacia mangium</i>                          | leaf spots        | KR611889           | KR611906 | —        |
| <i>Pseudolachnea fraxini</i>                          | CBS 113701, HHUF 30116 | T                   | Sweden          | <i>Fraxinus excelsior</i>                      | unknown           | JQ889287           | JQ889301 | AB934096 |
| <i>Pseudolachnea hispidula</i>                        | MAFF 244365            |                     | Japan           | <i>Morus bombycis</i>                          | dead twig         | AB934072           | AB934048 | AB934098 |
| <i>Pseudolachnella asymmetrica</i>                    | MAFF 244366            |                     | Japan           | <i>Phyllostachys nigra</i> var. <i>henonis</i> | dead twig         | AB934073           | AB934049 | AB934099 |
| <i>Pseudolachnella scolecospora</i>                   | MAFF 244379            |                     | Japan           | <i>Sasa</i> sp.                                | dead twigs        | AB934086           | AB934062 | AB934112 |
| <i>Pyrgemulla aurantiaca</i>                          | CBS 126743             | T                   | Hungary         | <i>Vitis vinifera</i>                          | bark              | HM241692           | HM241692 | —        |
| <i>Rattania aquatica</i>                              | MFLUCC 21-0006         | T                   | Thailand        | unidentified                                   | submerged wood    | MW260331           | MW287235 | —        |
| <i>Rattania setulifera</i>                            | GUFCC 15-501           | T                   | India           | <i>Calamus thwaitesii</i>                      | leaves            | GU191794           | HM171322 | —        |
| <i>Sporoschisma hemipilum</i>                         | MUCL 56487             |                     | Martinique      | unidentified                                   | wood              | MW987829           | MW987824 | —        |
| <i>Sporoschisma longicatenatum</i>                    | MFLUCC 16-0180         | T                   | Thailand        | unidentified                                   | submerged wood    | KX505871           | KX358077 | —        |
| <i>Sporoschisma mirabile</i>                          | CBS 144794             |                     | France          | <i>Alnus glutinosa</i>                         | submerged wood    | MW987830           | MW987825 | —        |
| <b><i>Stilbochaeta aquatica</i></b>                   | MFLUCC 15-0983         | T                   | Thailand        | unidentified                                   | submerged wood    | MH476572           | MH476569 | —        |
| <b><i>Stilbochaeta cangshanensis</i></b>              | MFLUCC 17-2214         | T                   | China           | unidentified                                   | submerged wood    | MK828632           | MK835832 | MN194083 |
| <b><i>Stilbochaeta septata</i></b>                    | CBS 143386             | E                   | Chile           | <i>Eucalyptus grandis</i>                      | leaves            | MH107889           | MH107936 | MH108015 |
| <b><i>Stilbochaeta submersa</i></b>                   | DLUCC 1014             | T                   | China           | unidentified                                   | submerged wood    | MK828631           | MK835831 | MN194082 |
| <i>Striatosphaeria castanea</i>                       | CBS 145352             | T                   | French Guinea   | woody liana                                    | decaying periderm | MT118244           | MT118229 | —        |
| <i>Striatosphaeria codinaeophora</i>                  | M.R. 1230              |                     | Puerto Rico     | <i>Dacryodes excelsa</i>                       | decaying wood     | AF178546           | AF178546 | —        |
| <i>Tainosphaeria crassiparves</i>                     | S.M.H. 1934            | T                   | Puerto Rico     | <i>Hymenaea</i> sp.                            | seed pod          | —                  | AF466089 | —        |
| <i>Tainosphaeria jonesii</i>                          | GZCC 16-0065           | P                   | China           | unidentified                                   | submerged wood    | KY026060           | KY026057 | —        |
| <i>Tainosphaeria jonesii</i>                          | GZCC 16-0053           |                     | China           | unidentified                                   | decaying wood     | KY026059           | KY026056 | —        |
| <i>Tainosphaeria siamensis</i>                        | MFLUCC 15-0607         | T                   | Thailand        | unidentified                                   | submerged wood    | KX609956           | KX609953 | —        |
| <b><i>Tainosphaeriella aquatica</i></b>               | MFLUCC 17-2370         | T                   | Thailand        | unidentified                                   | submerged wood    | MZ161197           | MZ161195 | MZ170694 |
| <b><i>Tainosphaeriella thailandense</i></b>           | MFLUCC 18-1282         | T                   | Thailand        | unidentified                                   | submerged wood    | MZ161196           | MZ161198 | MZ170695 |
| <i>Verhulstia trisororum</i>                          | CBS 143234             | T                   | The Netherlands | n/a                                            | soil              | MG022160           | MG022181 | —        |
| <i>Zanclospora iberica</i>                            | CBS 130426             | T                   | Spain           | unidentified                                   | decaying wood     | KY853480           | KY853544 | MW147327 |
| <i>Zanclospora novae-zelandiae</i>                    | ICMP 15781             | E                   | New Zealand     | <i>Fuscospora cliffortioides</i>               | decaying wood     | MW144429           | MW144411 | MW147330 |
| <i>Zanclospora ramifera</i>                           | ICMP 22738             | T                   | New Zealand     | unidentified                                   | decaying wood     | MW144433           | MW144415 | MW147334 |

Notes: <sup>1</sup> holotype of *Tainosphaeria obclavata*; <sup>2</sup> T, E, I, N and P denote ex-type, ex-epitype, ex-isotype, ex-neotype and ex-paratype strains.
